# Supplementary material for: Comparative Transcriptomics of Cold Growth and Adaptive Features of a Eury- and Steno-Psychrophile
Source: PubMed Central journal article supplement (PMC6080646; doi:10.3389/fmicb.2018.01565), 2018-07-31
Supplement: Image_1.pdf [file Image_1.pdf]

*Supplementary Material*

**Comparative Transcriptomics of Cold Growth and Adaptive Features of a Eury- and Steno-  
psychrophile**

**Isabelle Raymond-Bouchard<sup>1</sup>, Julien Tremblay<sup>2</sup>, Ianina Altshuler<sup>1</sup>, Charles Greer<sup>2</sup>, Lyle G. Whyte<sup>1\*</sup>**

**\*Correspondence:** Lyle Whyte: [lyle.whyte@mcgill.ca](mailto:lyle.whyte@mcgill.ca)

**Supplementary Figure**

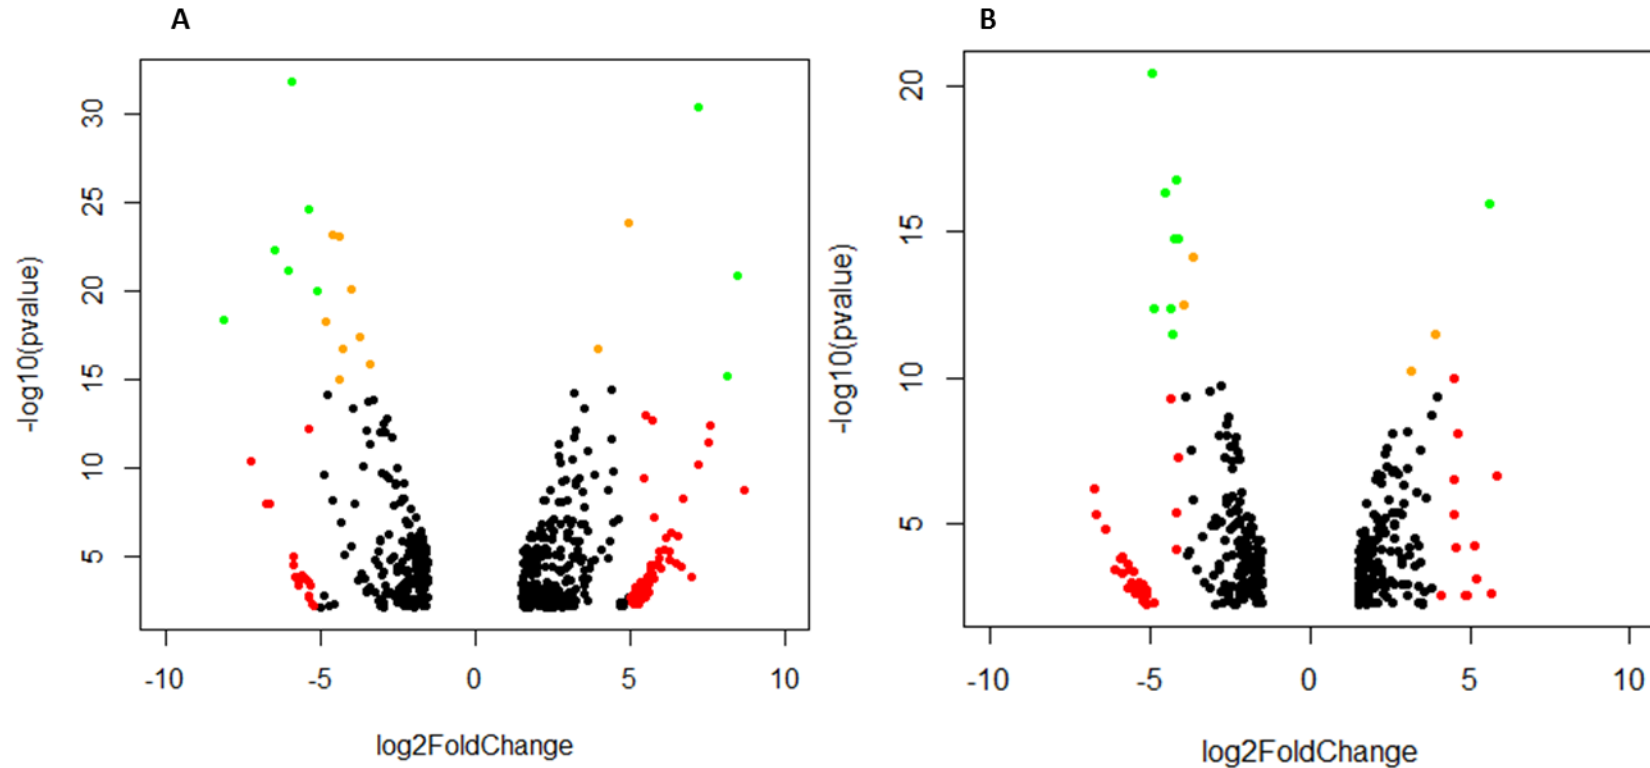

**Figure S1.** Volcano plot showing differentially expressed genes ( $\log_2$  fold change) at low temperatures that are statistically significant ( $p < 0.05$ ) in: **A)** *Rhodococcus* sp. JG3 and **B)** *Polaromonas* sp. Eur3 1.2.1. Negative  $\log_2$ -fold change are downregulated at low temperatures, while positive points represent upregulated genes, as compared to the higher temperatures. Red dots represent expressed genes with  $\log_2$  fold changes  $> 5$  for *Rhodococcus* sp. JG3 and  $> 4$  for *Polaromonas* sp. Eur3 1.2.1 at the cold temperatures; orange dots represent gene transcripts at cold temperatures with highly significant fold changes,  $-\log_{10}(\text{pvalue}) > 15$  for *Rhodococcus* sp. JG3 and  $> 10$  for *Polaromonas* sp. Eur3; and green dots represent genes that correspond to both categories.
